# Supplementary material for: Increased production of piRNAs from euchromatic clusters and genes in Anopheles gambiae compared with Drosophilamelanogaster
Source: Epigenetics Chromatin. 2015 Nov 27;8:50. doi: 10.1186/s13072-015-0041-5 (PMC4662822; doi:10.1186/s13072-015-0041-5)
Supplement: Supplementary file 17 — 10.1186/s13072-015-0041-5 piRNA mapping to the piRNA pathway genes and “reproduction and development” cluster genes in An. gambiae. [file 13072_2015_41_MOESM17_ESM.xlsx]

## Sheet: piRNA mapping
Table S10. piRNA mapping to the piRNA pathway genes and “reproduction and development” cluster genes in An. gambiae.
piRNA pathway genes	Mapped piRNAs	RPM
Aubergine/PIWI1 (AGAP011204)	182	9.68752
Aubergine/PIWI2 (AGAP009509)	199	10.5924
Argonaute 3 (AGAP008862)	73	3.88566
qin (AGAP012340)	65	3.45983
tudor (AGAP008268)	115	6.12124
papi (AGAP010171)	16	0.851651
spindle-E (AGAP002829)	62	3.30015
gasz (AGAP010482)	8	0.425825
Armitage (AGAP006939)	131	6.97289
Maelstrom (AGAP002022)	19	1.01133
Gawky (AGAP007808)	48	2.55495
Pacman (AGAP004430)	92	4.89699
me31b (AGAP009135)	741	39.4421
krimper (AGAP002475)	22	1.17102
vasa (AGAP003047)	40	2.12913
Reproduction/Development genes	Mapped piRNAs	RPM
RNA Helicase DDX4 (AGAP008578)	333	17.725
female sterile (1) nasrat (AGAP003290)	416	22.1429
kinesin heavy chain (AGAP000561)	225	11.9763
oskar (AGAP003545)	398	21.1848
pendulin (AGAP009792)	400	21.2913
twinstar (AGAP0012056)	190	10.1133
dynein heavy chain 64c (AGAP002015)	194	10.3263
female sterile (2) ketel (AGAP009921)	255	13.5732
purity of essence (AGAP001157)	449	23.8994
bruce (AGAP002651)	245	13.0409
hyperplastic discs (AGAP001780)	354	18.8428
moleskin (AGAP007299)	197	10.4859
effete (AGAP000145)	204	10.8585
bellwether (AGAP005134)	295	15.7023
